# Supplementary material for: Complex malaria epidemiology in an international border area between Brazil and French Guiana: challenges for elimination
Source: Trop Med Health. 2019 Apr 11;47:24. doi: 10.1186/s41182-019-0150-0 (PMC6458633; doi:10.1186/s41182-019-0150-0)
Supplement: Supplementary file 2 — Epidemiological database of the municipality of Oiapoque- Ap Brazil. (XLSX 47 kb) [file 41182_2019_150_MOESM2_ESM.xlsx]

## Sheet: epidemiological summary
	UF: AP MUNICÍPIO: OIAPOQUE
	População: 14.528
2003	Mês	Exame		Positivo		Total		Autóctone	Importado outro	Importado de	LVC		PLP	%F	F	V	F+V	M	O	Não F
		Detecção	Detecção	Detecção	Detecção	Exame	Positivo		Município da UF	outra UF/País	Exame	Positivo
		Passiva	Ativa	Passiva	Ativa
	JAN	657	28	166	0	685	166	44	2	120	1	1	24.2	51.2	82	81	3	0	0	0
	FEV	618	0	160	0	618	160	19	3	138	6	2	25.9	37.5	57	100	3	0	0	0
	MAR	697	19	200	0	716	200	30	2	168	32	8	27.9	50	95	100	5	0	0	0
	ABR	577	1	188	0	578	188	42	1	145	44	12	32.5	31.9	54	128	6	0	0	0
	MAI	524	6	250	0	530	250	67	3	180	21	16	47.2	38.4	94	154	2	0	0	0
	JUN	535	8	197	1	543	198	15	2	181	22	4	36.5	54.5	105	90	3	0	0	0
	JUL	721	0	312	0	721	312	57	3	252	17	5	43.3	35.6	103	201	8	0	0	0
	AGO	844	1	321	0	845	321	62	1	258	20	17	38	39.6	122	193	5	1	0	0
	SET	1036	4	415	0	1040	415	70	2	343	70	44	39.9	39.3	156	252	7	0	0	0
	OUT	1033	98	520	13	1131	533	190	8	335	65	23	47.1	34.9	174	346	12	1	0	0
	NOV	1284	68	584	3	1352	587	204	2	381	37	25	43.4	30.2	167	408	10	2	0	0
	DEZ	1105	75	546	1	1180	547	138	0	409	6	0	46.4	42.8	223	312	11	1	0	0
	TOTAL	9631	308	3859	18	9939	3877	938	29	2910	341	157	39	38.9	1432	2365	75	5	0	0
2004	JAN	1335	13	502	0	1348	502	96	406	2	1	33.4	9	37.2	47.4	228	264	10	0	0
	FEV	1174	35	349	2	1209	351	90	261	13	3	23.3	8	29	50.1	168	175	8	0	0
	MAR	1427	37	480	1	1464	481	103	378	0	0	32	9.7	32.9	53.8	241	222	18	0	0
	ABR	922	16	372	2	938	374	34	340	1	0	24.9	6.2	39.9	51.3	178	182	14	0	0
	MAI	866	2	331	0	868	331	30	301	1	1	22	5.8	38.1	46.8	146	176	9	0	0
	JUN	822	6	298	0	828	298	22	276	24	9	19.8	5.5	36	41.6	115	173	9	1	0
	JUL	752	142	326	39	894	365	54	311	62	24	24.3	5.9	40.8	41.9	140	212	13	0	0
	AGO	938	45	436	11	983	447	15	432	19	15	29.7	6.5	45.5	42.1	164	259	24	0	0
	SET	814	6	387	1	820	388	24	364	145	38	25.8	5.4	47.3	37.1	131	243	13	1	0
	OUT	1431	158	837	38	1589	875	205	670	113	51	58.2	10.6	55.1	31.3	262	600	12	1	0
	NOV	1456	810	616	26	2266	642	148	494	68	16	42.7	15.1	28.3	38.2	229	396	16	1	0
	DEZ	1079	127	512	11	1206	523	64	459	11	3	34.8	8	43.4	38.6	192	321	10	0	0
	Total	13016	1397	5446	131	14413	5577	885	4692	459	161	370.7	95.8	38.7	42.1	2194	3223	156	4	0
2005	Mês	Exame		Positivo		Total		Autóctone	Importado	LVC		IPA	IAES	ILP	IFA	F	V	F+V	M	O
									outro
									Município/
		BP	BA	BP	BA	Exame	Positivo		País	Exame	Positivo
	JAN	913	5	559	1	918	560	69	491	11	3	37.2	6.1	61	34.3	184	368	8	0	0
	FEV	1060	130	413	11	1190	424	74	350	156	53	28.2	7.9	35.6	40.3	163	251	8	2	0
	MAR	1110	24	303	3	1134	306	40	266	101	42	20.3	7.5	27	48	135	158	12	1	0
	ABR	852	46	302	4	898	306	54	252	62	21	20.3	6	34.1	45.8	130	166	10	0	0
	MAI	678	124	257	27	802	284	87	197	70	18	18.9	5.3	35.4	44.7	115	156	12	1	0
	JUN	687	282	278	40	969	318	141	177	59	13	21.1	6.4	32.8	43.7	127	179	12	0	0
	JUL	713	738	266	52	1451	318	84	234	66	22	21.1	9.6	21.9	53.1	154	149	15	0	0
	AGO	693	373	236	14	1066	250	62	188	60	33	16.6	7.1	23.5	40	91	150	9	0	0
	SET	762	211	323	7	973	330	111	219	70	27	21.9	6.5	33.9	39.7	121	199	10	0	0
	OUT	1017	275	446	17	1292	463	150	313	72	27	30.8	8.6	35.8	28.5	128	331	4	0	0
	NOV	1219	123	536	19	1342	555	200	355	58	18	36.9	8.9	41.4	27.4	137	403	15	0	0
	DEZ	1089	75	526	7	1164	533	244	289	81	32	35.4	7.7	45.8	29.8	142	373	17	1	0
	Total	10793	2406	4445	202	13199	4647	1316	3331	866	309	308.9	87.7	35.2	37.9	1627	2883	132	5	0
2006	JAN	1359	71	522	6	1430	528	273	255	20	1	32.5	8.8	36.9	32.4	154	357	17	0	0
	FEV	726	84	264	2	810	266	100	166	13	4	16.4	5	32.8	30.1	69	186	11	0	0
	MAR	848	54	363	8	902	371	146	225	13	3	22.9	5.6	41.1	28.8	95	264	12	0	0
	ABR	713	82	285	23	795	308	42	266	13	4	19	4.9	38.7	30.5	91	214	3	0	0
	MAI	1155	264	377	17	1419	394	129	265	43	18	24.3	8.7	27.8	27.2	97	287	10	0	0
	JUN	991	415	318	32	1406	350	87	263	35	19	21.6	8.7	24.9	36.6	107	222	21	0	0
	JUL	916	290	399	45	1206	444	119	325	30	15	27.4	7.4	36.8	42.3	141	256	47	0	0
	AGO	1014	336	471	79	1350	550	194	356	71	12	33.9	8.3	40.7	31.1	133	379	38	0	0
	SET	950	269	474	21	1219	495	127	368	74	21	30.5	7.5	40.6	35.6	141	319	35	0	0
	OUT	1800	529	997	51	2329	1048	372	676	65	29	64.6	14.4	45	36.6	305	664	79	0	0
	NOV	1916	466	976	47	2382	1023	596	427	155	41	63.1	14.7	42.9	24.4	220	772	30	1	0
	DEZ	1228	375	545	51	1603	596	304	292	168	33	36.7	9.9	37.2	39.6	213	360	23	0	0
	Total	13616	3235	5991	382	16851	6373	2489	3884	700	200	392.8	103.9	37.8	32.8	1766	4280	326	1	0
2007	JAN	1183	113	473	16	1296	489	117	372	61	19	28.1	7.4	37.7	40.7	172	290	27	0	0
	FEV	1121	112	351	15	1233	366	55	311	46	16	21	7.1	29.7	34.4	111	239	15	1	0
	MAR	1408	300	443	19	1708	462	134	328	78	25	26.5	9.8	27	32.9	127	310	25	0	0
	ABR	1395	446	467	51	1841	518	167	351	55	16	29.7	10.6	28.1	30.5	137	359	21	1	0
	MAI	1245	361	391	52	1606	443	113	330	90	27	25.4	9.2	27.6	27.1	98	323	22	0	0
	JUN	982	167	399	19	1149	418	115	303	110	49	24	6.6	36.4	35.4	123	270	25	0	0
	JUL	943	493	401	63	1436	464	158	306	148	50	26.6	8.2	32.3	31.5	132	318	14	0	0
	AGO	1177	393	497	42	1570	539	229	310	145	37	30.9	9	34.3	25.2	120	402	16	1	0
	SET	996	269	457	93	1265	550	322	228	86	15	31.6	7.3	43.5	25.1	121	412	17	0	0
	OUT	2172	812	1060	205	2984	1265	754	511	325	91	72.6	17.1	42.4	21.6	249	992	24	0	0
	NOV	1472	434	548	75	1906	623	352	271	377	57	35.8	10.9	32.7	23.3	132	477	13	1	0
	DEZ	1217	98	427	29	1315	456	230	226	177	61	26.2	7.5	34.7	20.8	85	360	10	1	0
	Total	15311	3998	5914	679	19309	6593	2746	3847	1698	463	378.4	110.8	34.1	27.8	1607	4752	229	5	0
2008	JAN	1291	203	343	38	1494	381	82	299	266	70	18.8	7.4	25.5	22.3	77	295	8	1	0
	FEV	978	95	266	18	1073	284	71	213	147	47	14	5.3	26.5	20.8	53	225	6	0	0
	MAR	945	446	256	22	1391	278	153	125	274	66	13.7	6.9	20	24.5	58	210	10	0	0
	ABR	916	257	234	68	1173	302	128	174	133	37	14.9	5.8	25.7	30.5	84	209	8	1	0
	MAI	1220	397	292	19	1617	311	164	147	137	41	15.4	8	19.2	26.7	75	228	8	0	0
	JUN	1119	167	271	11	1286	282	163	119	112	29	13.9	6.4	21.9	28.7	71	201	10	0	0
	JUL	737	88	241	12	825	253	166	87	84	23	12.5	4.1	30.7	28.9	63	180	10	0	0
	AGO	848	216	275	14	1064	289	166	123	172	47	14.3	5.3	27.2	27	65	211	13	0	0
	SET	1156	284	431	34	1440	465	317	148	229	61	23	7.1	32.3	29.2	112	329	24	0	0
	OUT	1440	247	575	48	1687	623	460	163	222	78	30.8	8.3	36.9	29.4	116	440	67	0	0
	NOV	2571	539	940	46	3110	986	804	182	366	64	48.7	15.4	31.7	25.9	191	731	64	0	0
	DEZ	2034	169	692	48	2203	740	556	184	247	81	36.6	10.9	33.6	26.4	149	545	46	0	0
	Total	15255	3108	4816	378	18363	5194	3230	1964	2389	644	256.8	90.8	28.3	26.7	1114	3804	274	2	0
2009	JAN	1806	636	447	10	2442	457	307	150	355	99	21.8	11.6	18.7	33.9	133	302	22	0	0
	FEV	1362	264	306	9	1626	315	202	113	346	56	15	7.8	19.4	29.2	74	223	18	0	0
	MAR	1130	368	268	52	1498	320	228	92	219	50	15.3	7.1	21.4	38.1	107	198	15	0	0
	ABR	1191	368	312	24	1559	336	224	112	177	34	16	7.4	21.6	26.8	73	246	17	0	0
	MAI	1135	873	403	58	2008	461	361	100	322	39	22	9.6	23	16.1	59	386	15	1	0
	JUN	1156	350	404	47	1506	451	357	94	164	40	21.5	7.2	29.9	17.5	70	372	9	0	0
	JUL	1427	310	521	36	1737	557	412	145	186	35	26.6	8.3	32.1	22.4	110	431	15	1	0
	AGO	1204	692	483	13	1896	496	301	195	192	45	23.7	9	26.2	25.6	102	368	25	1	0
	SET	1398	2372	519	82	3770	601	419	182	250	32	28.7	18	15.9	24	127	456	17	1	0
	OUT	931	895	369	50	1826	419	357	62	121	24	20	8.7	22.9	22.2	83	325	10	1	0
	NOV	289	259	88	5	548	93	93	0	103	7	4.4	2.6	17	10.8	10	83	0	0	0
	DEZ	580	55	183	9	635	192	126	66	77	29	9.2	3	30.2	35.9	60	122	9	1	0
	Total	13609	7442	4303	395	21051	4698	3387	1311	2512	490	224.1	100.4	22.3	25.1	1008	3512	172	6	0
2010	JAN	1264	147	377	38	1411	415	255	160	216	61	19.8	6.7	29.4	29.2	104	289	17	5	0
	FEV	1289	139	291	33	1428	324	201	123	203	54	15.5	6.8	22.7	30.2	86	223	12	3	0
	MAR	1067	340	298	38	1407	336	260	76	306	85	16	6.7	23.9	35.1	109	215	9	3	0
	ABR	939	200	255	30	1139	285	198	87	201	63	13.6	5.4	25	24.9	56	211	15	3	0
	MAI	994	256	284	29	1250	313	226	87	165	43	14.9	6	25	28.8	81	219	9	4	0
	JUN	1015	1280	234	61	2295	295	207	88	301	65	14.1	10.9	12.9	47.5	137	153	3	2	0
	JUL	864	655	260	97	1519	357	211	146	245	48	17	7.2	23.5	38.1	126	217	10	4	0
	AGO	1348	219	266	40	1567	306	185	121	202	47	14.6	7.5	19.5	44.4	130	166	6	4	0
	SET	974	162	264	17	1136	281	189	92	120	32	13.4	5.4	24.7	40.6	105	165	9	2	0
	OUT	1189	299	543	59	1488	602	467	135	155	35	28.7	7.1	40.5	37	212	379	11	0	0
	NOV	2357	269	1022	66	2626	1088	905	183	391	100	51.9	12.5	41.4	31.1	322	748	16	2	0
	DEZ	1896	2863	629	98	4759	727	573	154	433	95	34.7	22.7	15.3	33.1	224	484	17	2	0
	Total	15196	6829	4723	606	22025	5329	3877	1452	2938	728	254.2	105.1	24.2	34.3	1692	3469	134	34	0
2011	JAN	1561	1414	409	36	2975	445	322	1	122	303	96	15	42.9	182	253	9	1	0	0
	FEV	1141	1483	299	38	2624	337	226	1	110	210	68	12.8	37.7	122	208	5	2	0	0
	MAR	1221	3357	269	82	4578	351	256	1	94	210	80	7.7	32.2	104	237	9	1	0	0
	ABR	990	173	247	19	1163	266	197	3	66	156	43	22.9	19.5	47	212	5	2	0	0
	MAI	986	95	255	23	1081	278	197	0	81	134	45	25.7	20.1	50	221	6	1	0	0
	JUN	1039	105	245	18	1144	263	201	0	62	96	42	23	22.8	58	203	2	0	0	0
	JUL	1129	216	347	28	1345	375	292	1	82	146	55	27.9	25.1	86	281	8	0	0	0
	AGO	1015	877	401	153	1892	554	493	2	59	287	72	29.3	29.4	158	390	5	1	0	0
	SET	1001	636	428	49	1637	477	410	0	67	219	79	29.1	24.9	116	358	3	0	0	0
	OUT	1469	241	590	41	1710	631	544	3	84	103	64	36.9	31.4	191	433	7	0	0	0
	NOV	1243	1349	616	199	2592	815	767	3	45	255	83	31.4	21.5	164	639	11	1	0	0
	DEZ	1370	317	357	29	1687	386	321	0	65	140	64	22.9	28.8	107	275	4	0	0	0
	TOTAL	14165	10263	4463	715	24428	5178	4226	15	937	2259	791	21.2	28.2	1385	3710	74	9	0	0
2012	JAN	1162	39	208	14	1201	222	165	0	57	53	36	18.5	44.6	95	122	4	1	0	0
	FEV	941	98	168	20	1039	188	145	0	43	92	32	18.1	9	14	166	3	2	0	3
	MAR	1060	299	197	12	1359	209	143	0	66	129	41	15.4	23	42	158	6	3	0	0
	ABR	827	22	110	6	849	116	108	0	8	33	30	13.7	17.2	17	88	3	0	0	8
	MAI	1086	18	200	7	1104	207	150	0	57	16	14	18.8	25.1	42	140	10	1	0	14
	JUN	1110	21	183	12	1131	195	129	0	66	17	14	17.2	27.2	49	118	4	1	0	23
	JUL	1272	27	284	7	1299	291	212	0	79	24	20	22.4	18.9	51	192	4	2	0	42
	AGO	1372	437	329	9	1809	338	237	0	101	34	28	18.7	21.9	68	165	6	1	0	98
	SET	1433	315	285	3	1748	288	209	0	79	35	26	16.5	21.2	57	118	4	1	0	108
	OUT	1558	29	478	2	1587	480	346	0	134	34	28	30.2	21.9	91	291	14	2	0	82
	NOV	1358	33	448	9	1391	457	292	5	160	45	32	32.9	30	121	283	16	0	0	37
	DEZ	1247	44	428	1	1291	429	229	1	199	130	48	33.2	42	162	235	18	0	0	14
	TOTAL	14426	1382	3318	102	15808	3420	2365	6	1049	642	349	21.6	26.3	809	2076	92	14	0	429
2013	JAN	1712	141	415	45	1853	460	233	3	224	142	49	24.8	39.6	163	277	19	1	0	0
	FEV	1427	114	288	35	1541	323	173	8	142	70	25	21	29.4	87	227	8	0	0	1
	MAR	1263	121	221	28	1384	249	131	1	117	55	21	18	26.5	60	182	6	1	0	0
	ABR	1312	111	217	18	1423	235	96	1	138	31	8	16.5	40.4	77	139	18	1	0	0
	MAI	664	50	135	26	714	161	73	0	88	11	2	22.5	24.8	38	120	2	1	0	0
	JUN	246	83	92	13	329	105	47	7	51	7	2	31.9	20	19	83	2	0	0	1
	JUL	495	18	80	5	513	85	46	1	38	21	9	16.6	16.5	13	71	1	0	0	0
	AGO	490	34	89	4	524	93	67	3	23	30	12	17.7	16.1	14	74	1	0	0	4
	SET	707	192	72	11	899	83	43	2	38	8	1	9.2	27.7	22	58	1	0	0	2
	OUT	667	136	155	15	803	170	136	2	32	20	3	21.2	17.1	28	135	1	0	0	6
	NOV	608	110	123	21	718	144	98	5	41	47	5	20.1	14.6	16	120	5	0	0	3
	DEZ	617	34	88	19	651	107	67	4	36	23	18	16.4	11.2	10	95	2	0	0	0
	TOTAL	10208	1144	1975	240	11352	2215	1210	37	968	465	155	19.5	27.7	547	1581	66	4	0	17
2014	JAN	667	45	111	31	712	142	75	1	66	2	1	19.9	22.5	31	110	1	0	0	0
	FEV	538	46	51	8	584	59	38	5	16	4	0	10.1	18.6	10	48	1	0	0	0
	MAR	494	15	45	7	509	52	35	3	14	8	1	10.2	9.6	4	47	1	0	0	0
	ABR	338	421	30	4	759	34	15	0	19	39	3	4.5	20.6	5	27	2	0	0	0
	MAI	407	55	29	0	462	29	18	1	10	42	9	6.3	10.3	2	26	1	0	0	0
	JUN	356	29	44	1	385	45	22	0	23	36	11	11.7	15.6	6	37	1	0	0	1
	JUL	330	16	51	0	346	51	20	1	30	25	5	14.7	11.8	4	44	2	0	0	1
	AGO	302	81	43	2	383	45	33	0	12	41	8	11.7	11.1	5	39	0	0	0	1
	SET	465	550	57	3	1015	60	46	3	11	26	9	5.9	10	6	48	0	0	0	6
	OUT	742	497	119	14	1239	133	103	5	25	43	10	10.7	9	12	113	0	0	0	8
	NOV	935	459	167	13	1394	180	155	2	23	54	17	12.9	8.3	13	164	2	0	0	1
	DEZ	723	147	93	10	870	103	72	3	28	69	16	11.8	18.4	19	84	0	0	0	0
	TOTAL	6297	2361	840	93	8658	933	632	24	277	389	90	10.8	13.7	117	787	11	0	0	18
2015	JAN	749	56	94	7	805	101	68	1	32	78	23	12.5	10.9	10	90	1	0	0	0
	FEV	486	33	43	2	519	45	31	1	13	56	23	8.7	4.4	2	43	0	0	0	0
	MAR	496	36	51	2	532	53	34	0	19	46	14	10	22.6	11	41	1	0	0	0
	ABR	499	77	54	9	576	63	48	2	13	43	7	10.9	3.2	2	60	0	0	0	1
	MAI	565	70	70	5	635	75	62	2	11	48	7	11.8	2.7	0	63	2	0	0	10
	JUN	500	406	98	11	906	109	97	2	10	34	5	12	4.6	3	101	2	0	0	3
	JUL	415	439	109	14	854	123	112	1	10	103	14	14.4	2.4	3	73	0	0	0	47
	AGO	429	149	70	3	578	73	60	2	11	77	22	12.6	2.7	2	45	0	0	0	26
	SET	565	411	142	12	976	154	135	5	14	97	28	15.8	2.6	2	85	2	0	0	65
	OUT	667	390	209	16	1057	225	207	6	12	68	26	21.3	1.8	4	159	0	0	0	62
	NOV	544	229	125	12	773	137	116	1	20	92	28	17.7	3.6	4	115	1	0	0	17
	DEZ	480	67	68	10	547	78	59	4	15	59	22	14.3	5.1	4	72	0	0	0	2
	TOTAL	6395	2363	1133	103	8758	1236	1029	27	180	801	219	14.1	4.5	47	947	9	0	0	233

## Sheet: AGE GROUP
	Age
Year	< 1	%	1 a 4	%	5 a 9	%	10 a 14	%	15 a 19	%	20 a 29	%	30 a 39	%	40 a 49	%	50 a 59	%	60 a 69	%	70 a 79	%	80 a +
2003	9	1.94805	93	2.94211	124	2.93839	150	3.14994	392	7.0025	1445	8.75386	1010	9.05505	476	8.33625	133	6.36668	37	6.51408	5	4	1
2004	28	6.06061	201	6.35875	274	6.49289	295	6.19488	504	9.00322	2021	12.2433	1343	12.0405	650	11.3835	201	9.62183	43	7.39437	11	8.8	6
2005	29	6.27706	171	5.40968	202	4.78673	269	5.64889	422	7.53841	1552	9.40207	1107	9.92469	602	10.5429	235	11.2494	42	7.39437	7	5.6	4
2006	37	8.00866	358	11.3255	460	10.9005	520	10.9198	589	10.5216	1988	12.0434	1348	12.0854	698	12.2242	286	13.6908	70	12.3239	13	10.4	6
2007	48	10.3896	479	15.1534	602	14.2654	592	12.4318	634	11.3255	2002	12.1282	1265	11.3412	646	11.3135	248	11.8717	57	10.0352	17	13.6	3
2008	41	8.87446	380	12.0215	495	11.7299	570	11.9698	569	10.1643	1486	9.00224	895	8.02403	510	8.9317	167	7.99426	66	11.6197	9	7.2	6
2009	39	8.44156	356	11.2623	522	12.3697	529	11.1088	509	9.09253	1298	7.86333	780	6.99301	417	7.30298	178	8.52082	51	8.97887	16	12.8	3
2010	48	10.3896	264	8.35179	437	10.3555	598	12.5577	531	9.48553	1506	9.1234	1030	9.23436	606	10.613	209	10.0048	72	12.6761	19	15.2	9
2011	82	17.7489	479	15.1534	643	15.237	692	14.5317	728	13.0046	1470	8.90531	1012	9.07298	530	9.28196	232	11.1058	72	12.6761	14	11.2	11
2012	52	11.2554	264	8.35179	347	8.22275	373	7.83284	461	8.23508	1020	6.1792	736	6.59853	352	6.16462	116	5.5529	32	5.6338	11	8.8	5
2013	21	4.54545	116	3.66972	114	2.70142	174	3.65393	259	4.62665	719	4.35573	628	5.63027	223	3.90543	84	4.02106	26	4.57746	3	2.4	3
2014	10	2.1645	50	1.58178	69	1.63507	102	2.14196	122	2.17935	252	1.52663	203	1.81997	137	2.3993	61	2.92006	12	2.11268	2	1.6	3
2015	18	3.8961	124	3.92281	167	3.95735	191	4.01092	229	4.09075	323	1.95675	217	1.94549	121	2.11909	42	2.01053	16	2.8169	9	7.2	6
Total	462	100	3161		4220		4762		5598		16507		11154		5710		2089		568		125		66

## Sheet: endemic curve
	2003	2004	2005	2006	2007	2008	2009	2010	2011	2012	2013	2014	2015	Total
Jan	166	502	560	528	489	381	457	415	445	222	460	142	68	4835
Fev	160	351	424	266	366	284	315	324	337	188	323	59	31	3428
Mar	200	481	306	371	462	278	320	336	351	209	249	52	34	3649
Abr	188	374	306	308	518	302	336	285	266	116	235	34	48	3316
Mai	250	331	284	394	443	311	461	313	278	207	161	29	62	3524
Jun	198	298	318	350	418	282	451	295	263	195	105	45	97	3315
Jul	312	365	318	444	464	253	557	357	375	291	85	51	112	3984
Ago	321	447	250	550	539	289	496	306	554	338	93	45	60	4288
Set	415	388	330	495	550	465	601	281	477	288	83	60	135	4568
Out	533	875	463	1048	1265	623	419	602	631	480	170	133	207	7449
Nov	587	642	555	1023	623	986	93	1088	815	457	144	180	116	7309
Dez	547	523	533	596	456	740	192	727	386	429	107	103	59	5398
		Cases	Low Limit	Mean	Upper limit
2003	Jan	166	79.1658	240.571	401.977
	Fev	160	97.6212	219	340.379
	Mar	200	76.9647	197.929	318.892
	Abr	188	86.2797	204.214	322.149
	Mai	250	92.623	224.643	356.663
	Jun	198	93.6508	210.143	326.635
	Jul	312	76.1554	215.357	354.559
	Ago	321	32.2489	192.786	353.322
	Set	415	85.6493	250	414.351
	Out	533	138.318	375.571	612.825
	Nov	587	36.2139	306.714	577.215
	Dez	547	72.7049	284.714	496.724
2004	Jan	502	79.1658	240.571	401.977
	Fev	351	97.6212	219	340.379
	Mar	481	76.9647	197.929	318.892
	Abr	374	86.2797	204.214	322.149
	Mai	331	92.623	224.643	356.663
	Jun	298	93.6508	210.143	326.635
	Jul	365	76.1554	215.357	354.559
	Ago	447	32.2489	192.786	353.322
	Set	388	85.6493	250	414.351
	Out	875	138.318	375.571	612.825
	Nov	642	36.2139	306.714	577.215
	Dez	523	72.7049	284.714	496.724
2005	Jan	560	79.1658	240.571	401.977
	Fev	424	97.6212	219	340.379
	Mar	306	76.9647	197.929	318.892
	Abr	306	86.2797	204.214	322.149
	Mai	284	92.623	224.643	356.663
	Jun	318	93.6508	210.143	326.635
	Jul	318	76.1554	215.357	354.559
	Ago	250	32.2489	192.786	353.322
	Set	330	85.6493	250	414.351
	Out	463	138.318	375.571	612.825
	Nov	555	36.2139	306.714	577.215
	Dez	533	72.7049	284.714	496.724
2006	Jan	528	79.1658	240.571	401.977
	Fev	266	97.6212	219	340.379
	Mar	371	76.9647	197.929	318.892
	Abr	308	86.2797	204.214	322.149
	Mai	394	92.623	224.643	356.663
	Jun	350	93.6508	210.143	326.635
	Jul	444	76.1554	215.357	354.559
	Ago	550	32.2489	192.786	353.322
	Set	495	85.6493	250	414.351
	Out	1048	138.318	375.571	612.825
	Nov	1023	36.2139	306.714	577.215
	Dez	596	72.7049	284.714	496.724
2007	Jan	489	79.1658	240.571	401.977
	Fev	366	97.6212	219	340.379
	Mar	462	76.9647	197.929	318.892
	Abr	518	86.2797	204.214	322.149
	Mai	443	92.623	224.643	356.663
	Jun	418	93.6508	210.143	326.635
	Jul	464	76.1554	215.357	354.559
	Ago	539	32.2489	192.786	353.322
	Set	550	85.6493	250	414.351
	Out	1265	138.318	375.571	612.825
	Nov	623	36.2139	306.714	577.215
	Dez	456	72.7049	284.714	496.724
2008	Jan	381	79.1658	240.571	401.977
	Fev	284	97.6212	219	340.379
	Mar	278	76.9647	197.929	318.892
	Abr	302	86.2797	204.214	322.149
	Mai	311	92.623	224.643	356.663
	Jun	282	93.6508	210.143	326.635
	Jul	253	76.1554	215.357	354.559
	Ago	289	32.2489	192.786	353.322
	Set	465	85.6493	250	414.351
	Out	623	138.318	375.571	612.825
	Nov	986	36.2139	306.714	577.215
	Dez	740	72.7049	284.714	496.724
2009	Jan	457	79.1658	240.571	401.977
	Fev	315	97.6212	219	340.379
	Mar	320	76.9647	197.929	318.892
	Abr	336	86.2797	204.214	322.149
	Mai	461	92.623	224.643	356.663
	Jun	451	93.6508	210.143	326.635
	Jul	557	76.1554	215.357	354.559
	Ago	496	32.2489	192.786	353.322
	Set	601	85.6493	250	414.351
	Out	419	138.318	375.571	612.825
	Nov	93	36.2139	306.714	577.215
	Dez	192	72.7049	284.714	496.724
2010	Jan	415	79.1658	240.571	401.977
	Fev	324	97.6212	219	340.379
	Mar	336	76.9647	197.929	318.892
	Abr	285	86.2797	204.214	322.149
	Mai	313	92.623	224.643	356.663
	Jun	295	93.6508	210.143	326.635
	Jul	357	76.1554	215.357	354.559
	Ago	306	32.2489	192.786	353.322
	Set	281	85.6493	250	414.351
	Out	602	138.318	375.571	612.825
	Nov	1088	36.2139	306.714	577.215
	Dez	727	72.7049	284.714	496.724
2011	Jan	445	79.1658	240.571	401.977
	Fev	337	97.6212	219	340.379
	Mar	351	76.9647	197.929	318.892
	Abr	266	86.2797	204.214	322.149
	Mai	278	92.623	224.643	356.663
	Jun	263	93.6508	210.143	326.635
	Jul	375	76.1554	215.357	354.559
	Ago	554	32.2489	192.786	353.322
	Set	477	85.6493	250	414.351
	Out	631	138.318	375.571	612.825
	Nov	815	36.2139	306.714	577.215
	Dez	386	72.7049	284.714	496.724
2012	Jan	222	79.1658	240.571	401.977
	Fev	188	97.6212	219	340.379
	Mar	209	76.9647	197.929	318.892
	Abr	116	86.2797	204.214	322.149
	Mai	207	92.623	224.643	356.663
	Jun	195	93.6508	210.143	326.635
	Jul	291	76.1554	215.357	354.559
	Ago	338	32.2489	192.786	353.322
	Set	288	85.6493	250	414.351
	Out	480	138.318	375.571	612.825
	Nov	457	36.2139	306.714	577.215
	Dez	429	72.7049	284.714	496.724
2013	Jan	460	79.1658	240.571	401.977
	Fev	323	97.6212	219	340.379
	Mar	249	76.9647	197.929	318.892
	Abr	235	86.2797	204.214	322.149
	Mai	161	92.623	224.643	356.663
	Jun	105	93.6508	210.143	326.635
	Jul	85	76.1554	215.357	354.559
	Ago	93	32.2489	192.786	353.322
	Set	83	85.6493	250	414.351
	Out	170	138.318	375.571	612.825
	Nov	144	36.2139	306.714	577.215
	Dez	107	72.7049	284.714	496.724
2014	Jan	142	79.1658	240.571	401.977
	Fev	59	97.6212	219	340.379
	Mar	52	76.9647	197.929	318.892
	Abr	34	86.2797	204.214	322.149
	Mai	29	92.623	224.643	356.663
	Jun	45	93.6508	210.143	326.635
	Jul	51	76.1554	215.357	354.559
	Ago	45	32.2489	192.786	353.322
	Set	60	85.6493	250	414.351
	Out	133	138.318	375.571	612.825
	Nov	180	36.2139	306.714	577.215
	Dez	103	72.7049	284.714	496.724
2015	Jan	68	79.1658	240.571	401.977
	Fev	31	97.6212	219	340.379
	Mar	34	76.9647	197.929	318.892
	Abr	48	86.2797	204.214	322.149
	Mai	62	92.623	224.643	356.663
	Jun	97	93.6508	210.143	326.635
	Jul	112	76.1554	215.357	354.559
	Ago	60	32.2489	192.786	353.322
	Set	135	85.6493	250	414.351
	Out	207	138.318	375.571	612.825
	Nov	116	36.2139	306.714	577.215
	Dez	59	72.7049	284.714	496.724
